# Supplementary material
Source: publisher site journal article supplement (https://www.spandidos-publications.com/3454/downloadSupplementary)

Figure S1. (A) Western blot detection of endogenous ELF3 expression in six OC cell lines. (B) Kaplan-Meier overall survival analysis of patients with OC from The Cancer Genome Atlas, performed using the Gene Expression Profiling Interactive Analysis website. A total of 371 patients with OC were evenly divided into two groups according to the median expression of ELF3 (low ELF3 expression group, n=185; high ELF3 expression group n=186). E74-like E26 transformation-specific transcription factor 3; OC, ovarian cancer.

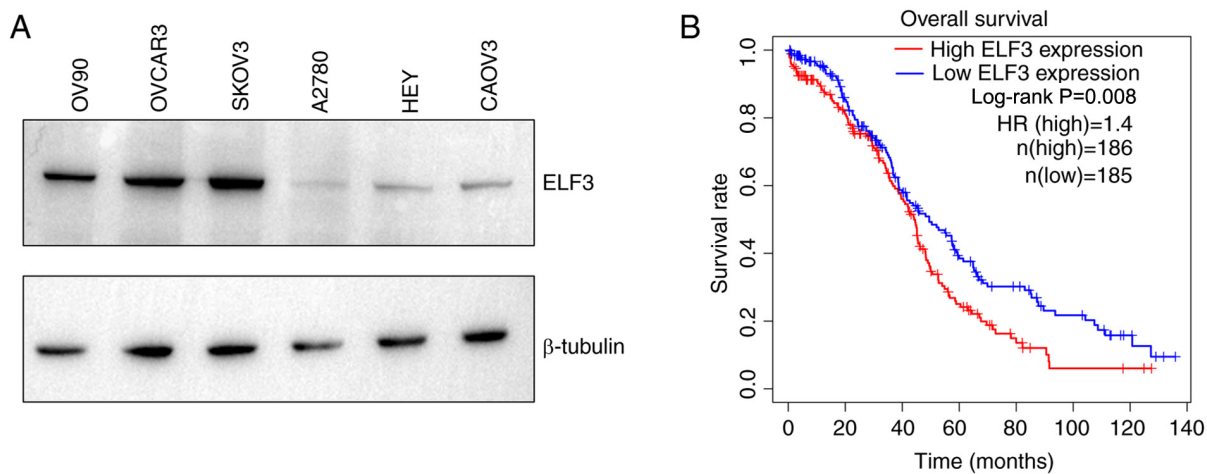

Supplement: Supplementary file 1 [file downloadSupplementary]
